# Supplementary material for: Regulation of mouse hepatic genes in response to diet induced obesity, insulin resistance and fasting induced weight reduction
Source: PubMed Central journal article supplement (PMC1201568; doi:10.1186/1743-7075-2-15), 2005-06-28
Supplement: 1743-7075-2-15-S1.pdf [file 1743-7075-2-15-S1.pdf]

| <p>Group A</p> 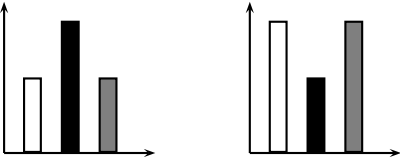 <p>White Bars = Control Mice<br/>Black Bars = High-Fat Mice<br/>Gray Bars = F/ WR Mice</p> <p>Genes up- or down-regulated by the high-fat diet and normalized to control levels by fasting/ weight reduction.</p> |            |              |               |            |                           |
|--------------------------------------------------------------------------------------------------------------------------------------------------------------------------------------------------------------------------------------------------------------------------------------------------------------------|------------|--------------|---------------|------------|---------------------------|
| Gene Name                                                                                                                                                                                                                                                                                                          | GenBank #  | Control Mice | High-Fat Mice | F/ WR Mice | Biological Role           |
| <i>Crym</i>                                                                                                                                                                                                                                                                                                        | NM_ 016669 | 100%         | 69%           | 120%       | $\mu$ -Crystallin         |
| <i>Cyp2c37</i>                                                                                                                                                                                                                                                                                                     | NM_ 010001 | 100%         | 30%           | 95%        | Cytochrome P450           |
| <i>Eva</i>                                                                                                                                                                                                                                                                                                         | BC015076   | 100%         | 162%          | 119%       | Epithelial V-like Antigen |
| <i>Kcnk8</i>                                                                                                                                                                                                                                                                                                       | NM_ 010609 | 100%         | 38%           | 77%        | Potassium Channel         |
| <i>Ndph</i>                                                                                                                                                                                                                                                                                                        | NM_ 010883 | 100%         | 164%          | 81%        | Neuron Function           |
| <i>Pmm1</i>                                                                                                                                                                                                                                                                                                        | AK004631   | 100%         | 46%           | 87%        | Protein Secretion         |
| <i>Serpina5</i>                                                                                                                                                                                                                                                                                                    | NM_ 008785 | 100%         | 171%          | 107%       | Serine Protease Inhibitor |
| <i>Sh3kbp1</i>                                                                                                                                                                                                                                                                                                     | AK004636   | 100%         | 241%          | 107%       | Signaling                 |
| <i>1110034G24Rik</i>                                                                                                                                                                                                                                                                                               | AK004090   | 100%         | 45%           | 80%        | Unknown                   |
| <i>1700019L13Rik</i>                                                                                                                                                                                                                                                                                               | AK006130   | 100%         | 55%           | 114%       | Unknown                   |
| <i>4930442L21Rik</i>                                                                                                                                                                                                                                                                                               | NM_ 026253 | 100%         | 220%          | 116%       | Unknown                   |
| <i>4930579D07Rik</i>                                                                                                                                                                                                                                                                                               | AK016314   | 100%         | 42%           | 72%        | Unknown                   |
| <i>4932422M17Rik</i>                                                                                                                                                                                                                                                                                               | AK016534   | 100%         | 72%           | 140%       | Unknown                   |

*continued on next page*

| <p><i>Group B</i></p> 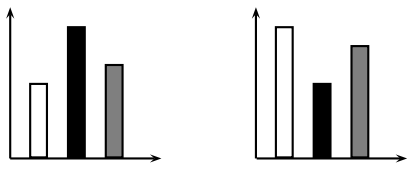 <p>White Bars = Control Mice<br/>Black Bars = High-Fat Mice<br/>Gray Bars = F/WR Mice</p> <p><i>Genes up- or down-regulated by the high-fat diet and partially normalized to control levels by fasting/ weight reduction.</i></p>                                    |           |              |               |           |                     |
|------------------------------------------------------------------------------------------------------------------------------------------------------------------------------------------------------------------------------------------------------------------------------------------------------------------------------------------------------------------------------|-----------|--------------|---------------|-----------|---------------------|
| Gene Name                                                                                                                                                                                                                                                                                                                                                                    | GenBank # | Control Mice | High-Fat Mice | F/WR Mice | Biological Role     |
| <i>Eif4a2</i>                                                                                                                                                                                                                                                                                                                                                                | NM_013506 | 100%         | 37%           | 58%       | Translation         |
| <i>Fsh<math>\beta</math>-like EST</i>                                                                                                                                                                                                                                                                                                                                        | AK017593  | 100%         | 40%           | 80%       | Hormone             |
| <i>Mup4</i>                                                                                                                                                                                                                                                                                                                                                                  | NM_008648 | 100%         | 38%           | 64%       | Secreted Protein    |
| <i>PTP4a2</i>                                                                                                                                                                                                                                                                                                                                                                | NM_008974 | 100%         | 71%           | 89%       | Signaling           |
| <i>RGS3</i>                                                                                                                                                                                                                                                                                                                                                                  | AF350047  | 100%         | 35%           | 54%       | Signaling           |
| <i>Tcam1</i>                                                                                                                                                                                                                                                                                                                                                                 | NM_029467 | 100%         | 49%           | 73%       | Adhesion Molecule   |
| <p><i>Group C</i></p>  <p>White Bars = Control Mice<br/>Black Bars = High-Fat Mice<br/>Gray Bars = F/WR Mice</p> <p><i>Genes up-regulated by high-fat diet and fasting/ weight reduction, or genes down-regulated by high-fat diet and up-regulated by fasting/ weight reduction.</i></p> |           |              |               |           |                     |
| Gene Name                                                                                                                                                                                                                                                                                                                                                                    | GenBank # | Control Mice | High-Fat Mice | F/WR Mice | Biological Role     |
| <i>1500004A08Rik</i>                                                                                                                                                                                                                                                                                                                                                         | AK005141  | 100%         | 149%          | 239%      | Unknown             |
| <i>2300009A05Rik</i>                                                                                                                                                                                                                                                                                                                                                         | AK009046  | 100%         | 79%           | 159%      | Unknown             |
| <i>2810055C24Rik</i>                                                                                                                                                                                                                                                                                                                                                         | AK012951  | 100%         | 64%           | 127%      | Protein Degradation |
| <i>continued on next page</i>                                                                                                                                                                                                                                                                                                                                                |           |              |               |           |                     |

| <p><i>Group D</i></p> 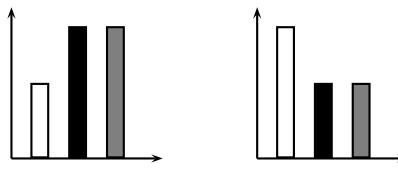 <p>White Bars = Control Mice<br/>Black Bars = High-Fat Mice<br/>Gray Bars = F/ WR Mice</p> <p><i>Genes up- or down-regulated by the high-fat diet and fasting/ weight reduction.</i></p> |           |              |               |            |                               |
|--------------------------------------------------------------------------------------------------------------------------------------------------------------------------------------------------------------------------------------------------------------------------------------------------|-----------|--------------|---------------|------------|-------------------------------|
| Gene Name                                                                                                                                                                                                                                                                                        | GenBank # | Control Mice | High-Fat Mice | F/ WR Mice | Biological Role               |
| <i>Bmp2</i>                                                                                                                                                                                                                                                                                      | NM_007553 | 100%         | 153%          | 210%       | Development                   |
| <i>Copz2</i>                                                                                                                                                                                                                                                                                     | NM_019877 | 100%         | 266%          | 521%       | Vesicle Trafficking           |
| <i>Fosb</i>                                                                                                                                                                                                                                                                                      | NM_008036 | 100%         | 231%          | 297%       | Signalling                    |
| <i>Gabrr1</i>                                                                                                                                                                                                                                                                                    | NM_008075 | 100%         | 245%          | 361%       | Receptor                      |
| <i>Has3</i>                                                                                                                                                                                                                                                                                      | NM_008217 | 100%         | 37%           | 49%        | Hyaluronan Synthesis          |
| <i>IL6st</i>                                                                                                                                                                                                                                                                                     | NM_010560 | 100%         | 154%          | 144%       | Signalling                    |
| <i>Rab3c</i>                                                                                                                                                                                                                                                                                     | NM_023852 | 100%         | 160%          | 260%       | Exocytosis                    |
| <i>Ttr</i>                                                                                                                                                                                                                                                                                       | NM_013697 | 100%         | 63%           | 44%        | Hormone Transport             |
| <i>1110007C24Rik</i>                                                                                                                                                                                                                                                                             | AK014449  | 100%         | 255%          | 459%       | Unknown                       |
| <i>2700062B08Rik</i>                                                                                                                                                                                                                                                                             | NM_029838 | 100%         | 266%          | 405%       | Putative Collagen-like (CLAC) |
| <i>3110004A18Rik</i>                                                                                                                                                                                                                                                                             | AK013988  | 100%         | 258%          | 463%       | Unknown                       |
| <i>4833414G15Rik</i>                                                                                                                                                                                                                                                                             | AK019515  | 100%         | 162%          | 257%       | Putative Phosphatase          |
| <i>4933432M07Rik</i>                                                                                                                                                                                                                                                                             | AK017027  | 100%         | 223%          | 191%       | Protein Degradation           |
| <i>5730458M16Rik</i>                                                                                                                                                                                                                                                                             | AK017674  | 100%         | 200%          | 235%       | Unknown                       |

*continued on next page*

|                                                                                                                                                                                                                                                                                                |           |              |               |            |                    |
|------------------------------------------------------------------------------------------------------------------------------------------------------------------------------------------------------------------------------------------------------------------------------------------------|-----------|--------------|---------------|------------|--------------------|
| <p><i>Group E</i></p> 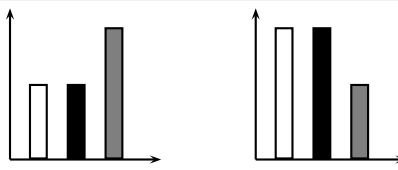 <p>White Bars = Control Mice<br/>Black Bars = High-Fat Mice<br/>Gray Bars = F/ WR Mice</p> <p><i>Genes up- or down-regulated by fasting/ weight reduction.</i></p>                     |           |              |               |            |                    |
| Gene Name                                                                                                                                                                                                                                                                                      | GenBank # | Control Mice | High-Fat Mice | F/ WR Mice | Biological Role    |
| <i>Ctrl</i>                                                                                                                                                                                                                                                                                    | NM_023182 | 100%         | 121%          | 327%       | Protein Metabolism |
| <i>Resp18</i>                                                                                                                                                                                                                                                                                  | NM_009049 | 100%         | 88%           | 54%        | Hormone Secretion  |
| <i>Snrpg</i>                                                                                                                                                                                                                                                                                   | NM_026506 | 100%         | 89%           | 199%       | Translation        |
| <i>2310034L21Rik</i>                                                                                                                                                                                                                                                                           | NM_025631 | 100%         | 123%          | 225%       | Unknown            |
| <p><i>Group F</i></p>  <p>White Bars = Control Mice<br/>Black Bars = High-Fat Mice<br/>Gray Bars = F/ WR Mice</p> <p><i>Genes up- or down-regulated by high-fat diet and fasting/ weight reduction.</i></p> |           |              |               |            |                    |
| Gene Name                                                                                                                                                                                                                                                                                      | GenBank # | Control Mice | High-Fat Mice | F/ WR Mice | Biological Role    |
| <i>1700095D18Rik</i>                                                                                                                                                                                                                                                                           | AK007076  | 100%         | 158%          | 293%       | RNA-binding Region |
